# Supplementary material for: Mapping the Americanization of English in space and time
Source: PLOS journal article supplement (doi:10.1371/journal.pone.0197741), 2018-05-25
Supplement: S2 (10.1371/journal.pone.0197741.s002) [file journal.pone.0197741.s002]

The Google Books data information was downloaded from the American English and British English Ngram (N=1) viewer datasets available at <https://storage.googleapis.com/books/ngrams/books/datasetsv2.html>. These files enumerate how many times each word appears in the Google Books corpus each year.
